# Supplementary material for: Correlation between Topographic Progression of Geographic Atrophy and Visual Acuity Changes
Source: PubMed Central journal article supplement — Korean J Ophthalmol. 2021 Sep 6;35(6):448–54. doi: 10.3341/kjo.2021.0037 (PMC8666263; doi:10.3341/kjo.2021.0037), 2021-09-06
Supplement: kjo-2021-0037-suppl1.pdf [file kjo-2021-0037-suppl1.pdf]

**Supplementary Table 1.** Baseline characteristics

| No. | Patient    | Visual acuity (logMAR) | Configuration [4] | Inner zone | Inner zone area | Progression to inner zone | Status |
|-----|------------|------------------------|-------------------|------------|-----------------|---------------------------|--------|
| 1   | Patient 1  | 0.7                    | Unifocal          | 1          | 0.19            | -                         | Phakic |
| 2   | Patient 2  | 0.3                    | Unifocal          | 3          | 0.02            | Stationary                | Pseudo |
| 3   | Patient 2  | 0.3                    | Multifocal        | 6          | 0.08            | Stationary                | Pseudo |
| 4   | Patient 3  | 0.2                    | Multifocal        | 1          | 0.02            | -                         | Phakic |
| 5   | Patient 3  | 0.2                    | Multifocal        | 2          | 0.08            | Stationary                | Phakic |
| 6   | Patient 4  | 1.3                    | Multifocal        | 1          | 0.6             | -                         | Pseudo |
| 7   | Patient 4  | 0.5                    | Multifocal        | 1          | 0.44            | -                         | Pseudo |
| 8   | Patient 5  | 0.3                    | Multifocal        | 1          | 0.74            | -                         | Phakic |
| 9   | Patient 6  | 0.05                   | Multifocal        | 2          | 0.12            | 2 Year to zone 1          | Pseudo |
| 10  | Patient 6  | 0.05                   | Multifocal        | 2          | 0.06            | 2 Year to zone 1          | Phakic |
| 11  | Patient 7  | 0.4                    | Multifocal        | 1          | 0.91            | -                         | Phakic |
| 12  | Patient 7  | 0.3                    | Multifocal        | 1          | 0.65            | -                         | Phakic |
| 13  | Patient 8  | 0.5                    | Unifocal          | 1          | 0.5             | -                         | Phakic |
| 14  | Patient 8  | 0.8                    | Unifocal          | 1          | 0.64            | -                         | Phakic |
| 15  | Patient 9  | 0                      | Multifocal        | 3          | 1.03            | 1 Year to zone 2          | Phakic |
| 16  | Patient 9  | 0.15                   | Multifocal        | 2          | 0.09            | Stationary                | Phakic |
| 17  | Patient 10 | 0.05                   | Unifocal          | 2          | 0.01            | 1 Year to zone 1          | Phakic |
| 18  | Patient 10 | 0.05                   | Multifocal        | 3          | 0.19            | 1 Year to zone 2          | Phakic |
| 19  | Patient 11 | 0.15                   | Unifocal          | 1          | 0.08            | -                         | Phakic |
| 20  | Patient 12 | 0.15                   | Multifocal        | 3          | 0.02            | 1 Year to zone 2          | Pseudo |
| 21  | Patient 13 | 0.4                    | Multifocal        | 2          | 0.07            | Stationary                | Phakic |
| 22  | Patient 14 | 1.0                    | Multifocal        | 1          | 0.78            | -                         | Phakic |
| 23  | Patient 15 | 0                      | Multifocal        | 2          | 0.34            | Stationary                | Phakic |
| 24  | Patient 16 | 0.3                    | Unifocal          | 2          | 0.15            | 3 Year to zone 1          | Phakic |
| 25  | Patient 17 | 1.6                    | Multifocal        | 1          | 0.68            | -                         | Phakic |
| 26  | Patient 18 | 0.3                    | Multifocal        | 1          | 0.78            | -                         | Phakic |
| 27  | Patient 19 | 0.1                    | Multifocal        | 4          | 0.08            | Stationary                | Phakic |
| 28  | Patient 19 | 0.1                    | Multifocal        | 4          | 0.08            | Stationary                | Phakic |
| 29  | Patient 20 | 0.9                    | Unifocal          | 1          | 1.05            | -                         | Phakic |
| 30  | Patient 20 | 0.9                    | Unifocal          | 1          | 1.2             | -                         | Phakic |
| 31  | Patient 21 | 0.3                    | Multifocal        | 2          | 0.18            | 1 Year to zone 1          | Phakic |
| 32  | Patient 22 | 0.5                    | Unifocal          | 3          | 0.6             | Stationary                | Phakic |
| 33  | Patient 23 | 0.4                    | Unifocal          | 1          | 0.09            | -                         | Phakic |
| 34  | Patient 24 | 0.4                    | Multifocal        | 1          | 0.05            | -                         | Phakic |
| 35  | Patient 25 | 0.2                    | Unifocal          | 5          | 0.68            | 2 Year to zone 4          | Phakic |
| 36  | Patient 26 | 0.3                    | Unifocal          | 3          | 0.07            | Stationary                | Phakic |

logMAR = logarithm of the minimal angle of resolution.
