# Supplementary material for: Correlation between Topographic Progression of Geographic Atrophy and Visual Acuity Changes
Source: PubMed Central journal article supplement — Korean J Ophthalmol. 2021 Sep 6;35(6):448–54. doi: 10.3341/kjo.2021.0037 (PMC8666263; doi:10.3341/kjo.2021.0037), 2021-09-06
Supplement: kjo-2021-0037-suppl2.pdf [file kjo-2021-0037-suppl2.pdf]

**Supplementary Table 2.** The number of eyes divided by follow-up period

| Mean follow-up period (yr) | No. of eyes (%) |
|----------------------------|-----------------|
| 1                          | 5 (13.89)       |
| 2                          | 6 (16.67)       |
| 3                          | 8 (22.22)       |
| 4                          | 9 (25.00)       |
| 5                          | 3 (8.33)        |
| 6                          | 5 (13.89)       |
| Total                      | 36 (100)        |
