# Supplementary material for: Correlation between Topographic Progression of Geographic Atrophy and Visual Acuity Changes
Source: PubMed Central journal article supplement — Korean J Ophthalmol. 2021 Sep 6;35(6):448–54. doi: 10.3341/kjo.2021.0037 (PMC8666263; doi:10.3341/kjo.2021.0037), 2021-09-06
Supplement: kjo-2021-0037-suppl3.pdf [file kjo-2021-0037-suppl3.pdf]

**Supplementary 3.** The degree of accuracy of measured atrophic area was analyzed using intraclass correlation

| Variable               | Intraclass correlation coefficient (95% confidence interval) | <i>p</i> -value |
|------------------------|--------------------------------------------------------------|-----------------|
| Total area trial 1 & 2 | 0.98 (0.97–0.99)                                             | <0.001          |
| Zone 1                 | 1.00 (1.00–1.00)                                             | <0.001          |
| Zone 2                 | 0.99 (0.98–0.99)                                             | <0.001          |
| Zone 3                 | 0.98 (0.97–0.99)                                             | <0.001          |
| Zone 4                 | 0.98 (0.96–0.98)                                             | <0.001          |
| Zone 5                 | 0.98 (0.97–0.99)                                             | <0.001          |
| Zone 6                 | 0.93 (0.90–0.95)                                             | <0.001          |
