# Supplementary material for: Correlation between Topographic Progression of Geographic Atrophy and Visual Acuity Changes
Source: PubMed Central journal article supplement — Korean J Ophthalmol. 2021 Sep 6;35(6):448–54. doi: 10.3341/kjo.2021.0037 (PMC8666263; doi:10.3341/kjo.2021.0037), 2021-09-06
Supplement: kjo-2021-0037-suppl4.pdf [file kjo-2021-0037-suppl4.pdf]

**Supplementary 4.** Relationship between decrease of best corrected visual acuity and change of atrophic area was analyzed using generalized linear model

| Atrophic area | Coefficient (r) | <i>p</i> -value |
|---------------|-----------------|-----------------|
| Total area    | 0.51            | 0.062           |
| Zone 1        | 0.71            | 0.028*          |
| Zone 2        | 0.73            | 0.002*          |
| Zone 3        | 0.71            | 0.002*          |
| Zone 4        | 0.59            | 0.008*          |
| Zone 5        | 0.50            | 0.610           |
| Zone 6        | 0.41            | 0.058           |

\*Statistically significant value.
